# Supplementary material for: Insights into the pathogenesis of hereditary angioedema using genetic sequencing and recombinant protein expression analyses
Source: PubMed Central journal article supplement — J Allergy Clin Immunol. Author manuscript; Available in PMC 2023 Aug 24. (PMC10449387; doi:10.1016/j.jaci.2022.11.027), 2022-12-29
Supplement: NIHMS1925128-supplement-1.pdf [file NIHMS1925128-supplement-1.pdf]

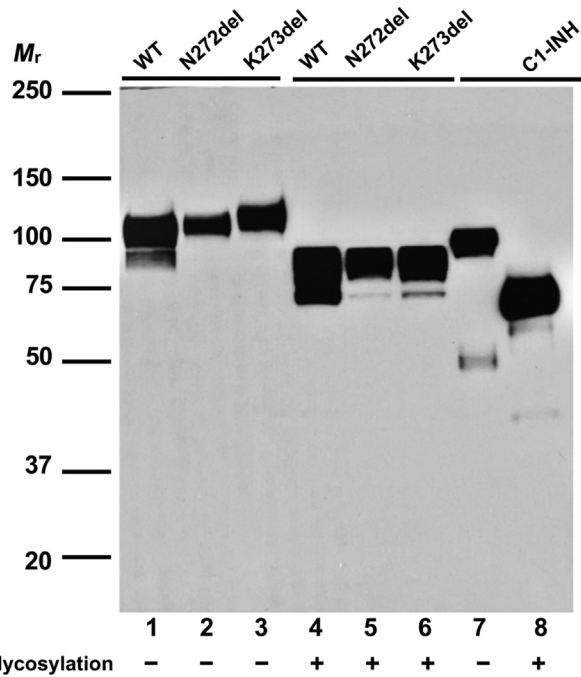

**FIG E1.** WB analysis of variants N272del and K273del before and after treatment with glycosidases. Before treatment, K273del (lane 3) has a slightly higher  $M_r$  compared with N272del (lane 2). After treatment, WB demonstrates that N272del (lane 5) and K273del (lane 6) have the same  $M_r$ . Human purified C1-INH was used as a positive control (lane 7, before treatment; lane 8, after treatment). Deglycosylation mix contains Peptide-N-Glycosidase F (PNGase F), O-glycosidase, neuraminidase,  $\beta$ 1-4-galactosidase S, and  $\beta$ -N-acetylhexosaminidase. It removes both N-linked and "simple" O-linked glycans.

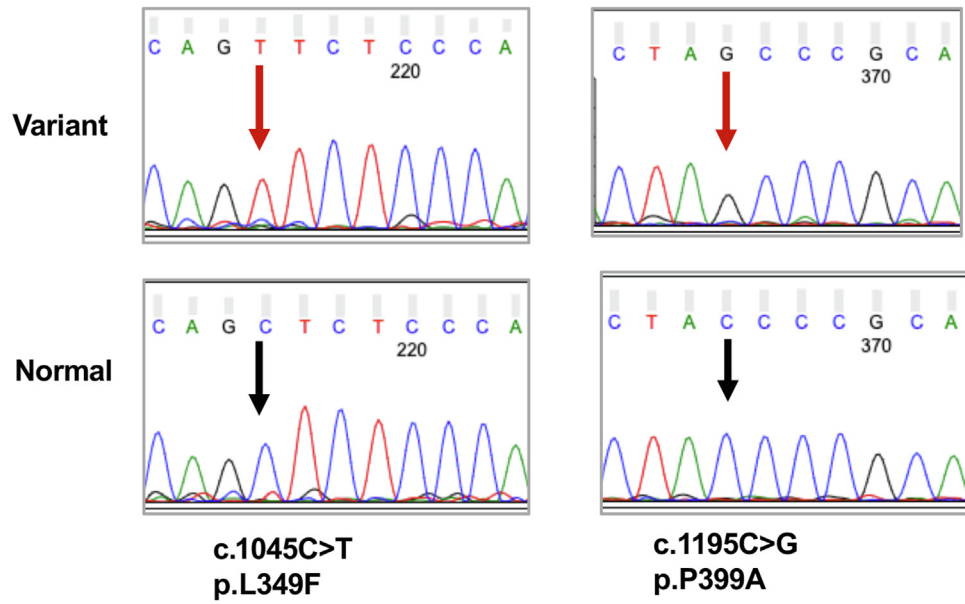

**FIG E2.** SGS confirms that the variants c.1045C>T (p.L349F) and c.1195C>G (p.P399A) are located on different alleles.

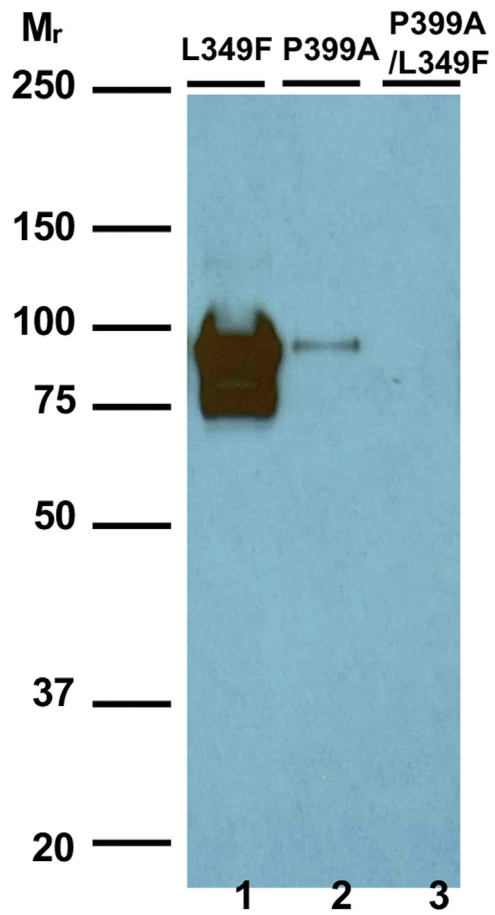

**FIG E3.** Recombinant expression of C1-INH variants L349F, P399A, and L349F/P399A double mutants in nonreducing condition. L349F has normal secretion compared with that of WT (not shown). P399A and L349F/P399A were barely secreted.

**TABLE E1.** Medications approved for the treatment of HAE

| Medication<br>(trade name)          | HAE medication list                     |             |           | Patient response (patient no.) |                |                 |                 |              |                    |              |      |     |      |      |
|-------------------------------------|-----------------------------------------|-------------|-----------|--------------------------------|----------------|-----------------|-----------------|--------------|--------------------|--------------|------|-----|------|------|
|                                     | Mechanism of action                     | Prophylaxis | On demand | 504<br>I224S                   | 601<br>N272del | 1201<br>K273del | 1301<br>K273del | 701<br>P399A | 702<br>L349F/P399A | 801<br>F471C |      | 901 | 1001 | 1101 |
| Plasma-derived C1-INH<br>(Cinryze)  | C1-INH (human)<br>concentrate, IV       | Yes         | No        | NA                             | NA             | NA              | NA              | NA           | NA                 | NA           | NA   | NA  | NA   | NA   |
| Plasma-derived C1-INH<br>(Berinert) | C1-INH (human)<br>concentrate, IV       | Yes         | Yes       | Yes                            | NA             | Yes             | NA              | NA           | NA                 | NA           | NA   | NA  | NA   | NA   |
| Plasma-derived C1-INH<br>(Haegarda) | C1-INH (human)<br>concentrate, SC       | Yes         | No        | NA                             | NA             | Yes             | NA              | NA           | NA                 | NA           | Yes  | NA  | NA   | NA   |
| Recombinant C1-INH<br>(Ruconest)    | C1-INH (recombinant)<br>concentrate, IV | No          | Yes       | NA                             | NA             | NA              | NA              | NA           | NA                 | NA           | NA   | NA  | NA   | NA   |
| Fresh frozen plasma*                | Contains C1-INH, IV                     | No          | Yes       | No                             | NA             | NA              | NA              | NA           | NA                 | NA           | NA   | NA  | NA   | NA   |
| Lanadelumab (Takhzyro)              | mAb kallikrein<br>inhibitor, SC         | Yes         | No        | NA                             | Yes            | NA              | Yes             | NA           | NA                 | NA           | NA   | Yes | Yes  | Yes  |
| Ecallantide (Kalbitor)              | Recombinant kallikrein<br>inhibitor, SC | No          | Yes       | NA                             | NA             | ANA†            | NA              | NA           | NA                 | NA           | ANA‡ | NA  | NA   | NA   |
| Bertralstat (Orladeyo)              | Plasma kallikrein<br>inhibitor, oral    | No          | Yes       | NA                             | NA             | NA              | NA              | NA           | NA                 | NA           | No   | No  | NA   | NA   |
| Icatibant (Firazyr)                 | Bradykinin receptor<br>antagonist, SC   | No          | Yes       | NA                             | Yes            | No              | No              | Yes          | Yes                | Yes          | No   | No  | Yes  | Yes  |

ANA, Anaphylaxis; IV, intravenous; NA, not applicable.

\*Fresh frozen plasma is a second-line therapy in the acute treatment of laryngeal attacks and severe gastrointestinal attacks if first-line therapies are not available.

†After the administration of ecallantide, patient 1201 developed flushing, dyspnea, and loss of consciousness within a few minutes.

‡The patient developed an anaphylactic reaction consisting of chills, dyspnea, and paleness within minutes after receiving the ninth dose of ecallantide.
